# Supplementary material
Source: PubMed Central journal article supplement (PMC3421552)
Supplement: AAC.00912-12_zac999101123so1.pdf [file AAC.00912-12_zac999101123so1.pdf]

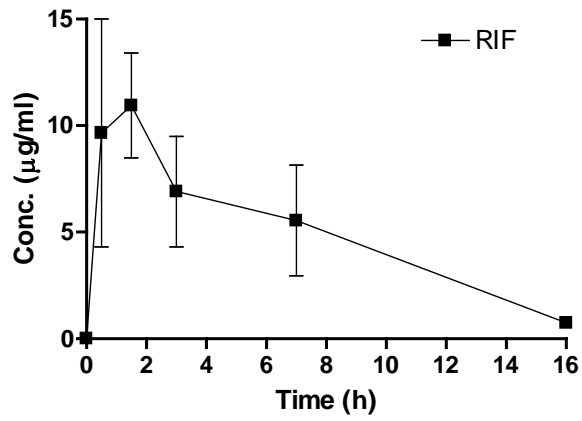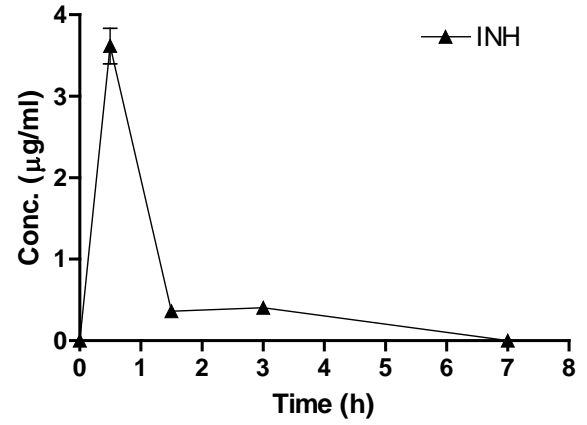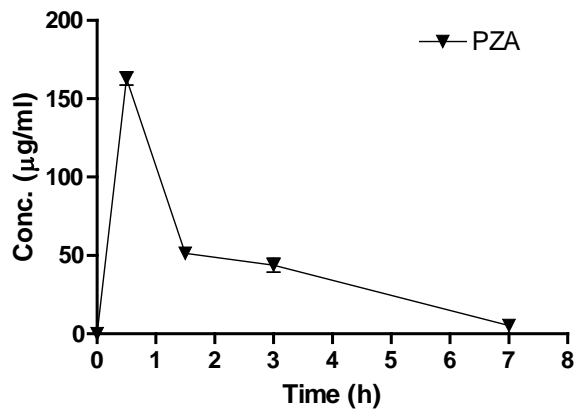

**Figure S1.** Mean ( $\pm$  S.D.) serum concentrations of rifampin (RIF), isoniazid (INH), and pyrazinamide (PZA) after a single dose of 10, 10, and 150 mg/kg, respectively, in C3HeB/FeJ mice

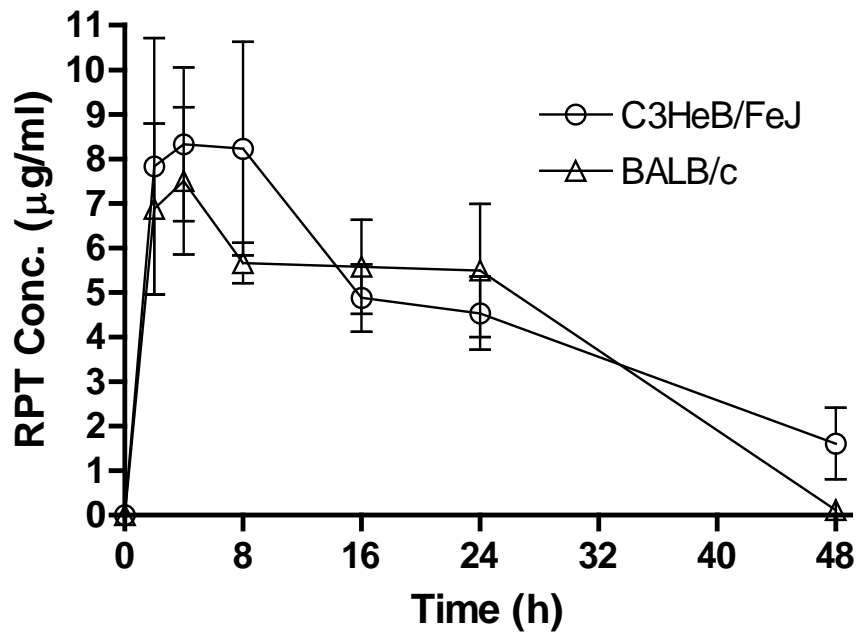

**Figure S2.** Mean ( $\pm$  S.D.) serum concentrations of rifapentine after a single dose of 10 mg/kg in C3HeB/FeJ and BALB/c mice
